# Supplementary material for: Detecting Mycobacterium Tuberculosis using a nitrofuranyl calanolide–trehalose probe based on nitroreductase Rv2466c
Source: Royal Society of Chemistry journal article supplement (doi:10.1039/d1cc05187c), 2021-01-01
Supplement: d1cc05187c1.pdf [file d1cc05187c1.pdf]

Supplementary Information for

**Detecting *Mycobacterium Tuberculosis* by nitrofuranyl calanolide-trehalose  
probe based on nitroreductase Rv2466c**

Xueyuan Li,<sup>1,2</sup> Pengfei Geng,<sup>1</sup> Xiaoqiao Hong,<sup>1</sup> Zhaogang Sun,<sup>\*3,4</sup> Gang Liu<sup>\*1</sup>

<sup>1</sup> School of Pharmaceutical Sciences, Tsinghua University, Haidian Dist., Beijing 100084, P. R. China

<sup>2</sup> Tsinghua-Peking Center for Life Sciences, Handian Dist., Beijing 100084, P. R. China

<sup>3</sup> Translational Medicine Center, Beijing Chest Hospital, Capital Medical University, Beijing, 101149,  
China

<sup>4</sup> Beijing Key Laboratory in Drug Resistant Tuberculosis Research, Beijing Tuberculosis & Thoracic  
Tumor Research Institute, Beijing, 101149, China

## Table of Contents

|                                                                               |    |
|-------------------------------------------------------------------------------|----|
| 1. General Chemical Methods .....                                             | 3  |
| 2. Bacterial Growth Conditions and Strains .....                              | 13 |
| 3. Animals and Cell Culture .....                                             | 13 |
| 4. The Fluorescence Intensity of Bacteria Was Analyzed by Flow Cytometry..... | 14 |
| 5. Microscope for Fluorescence Imaging .....                                  | 14 |
| 6. Visualizing Mycobacteria in Macrophages with NFC-Tre-5 .....               | 14 |
| 7. Figures .....                                                              | 15 |
| 9. NMR Spectra .....                                                          | 21 |
| 10. References.....                                                           | 26 |
| 11. Acknowledgment.....                                                       | 26 |

## 1. General Chemical Methods

Details about the synthesis of all chemical entities described in this article are in the Supporting Information. All chemicals were purchased as reagent grade and used without further purification unless otherwise noted. Analytical thin-layer chromatography (TLC) plates, preparative TLC plates, and silica gel for column chromatography were purchased from Qingdao Haiyang Chemical and Special Silica Gel Co., Ltd. Automatic liquid chromatography–mass spectrometry (LC–MS) analysis was performed on a Waters SQ Advantage mass spectrometer equipped with an ultraperformance LC (UPLC) system and an eluent splitter (5% eluent was split into the MS system). High-resolution LC–MS was conducted using an Agilent LC/mass selective detector (MSD) time of flight (TOF) with an Agilent ZORBAX SB-C18 (rapid resolution, 3.5  $\mu\text{m}$ , 2.1 mm  $\times$  30 mm) column at a flow rate of 0.40 mL/min. The solvent was MeOH/water (75:25 (v/v)) containing 5 mmol/L ammonium formate. The ion source was electrospray ionization (ESI). Proton nuclear magnetic resonance ( $^1\text{H}$  NMR) and carbon nuclear magnetic resonance ( $^{13}\text{C}$  NMR) spectroscopy were performed on Bruker Advance 400M NMR and 800M NMR spectrometers.

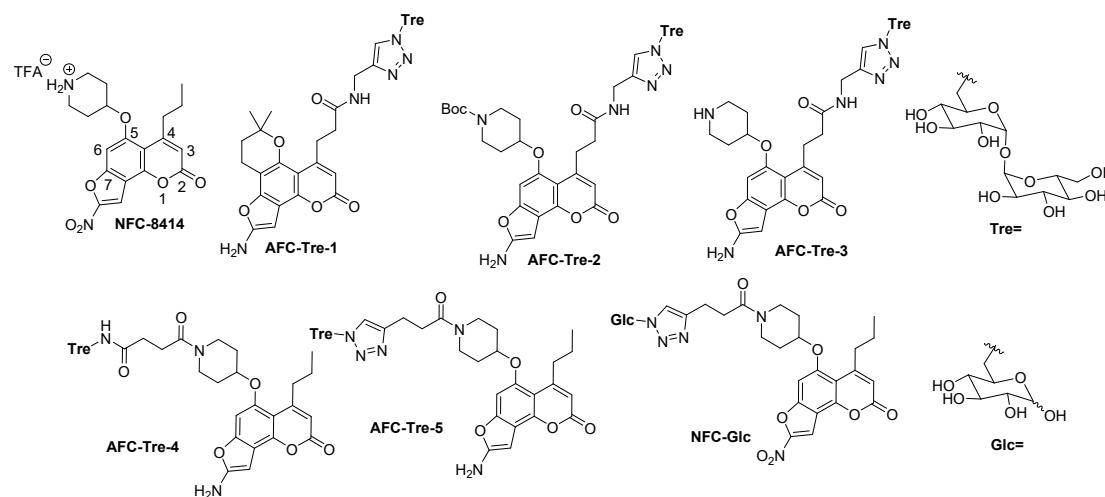

**Scheme S1.** Structures of **NFC-8414**, **AFC-Tre** and **NFC-Glc**.

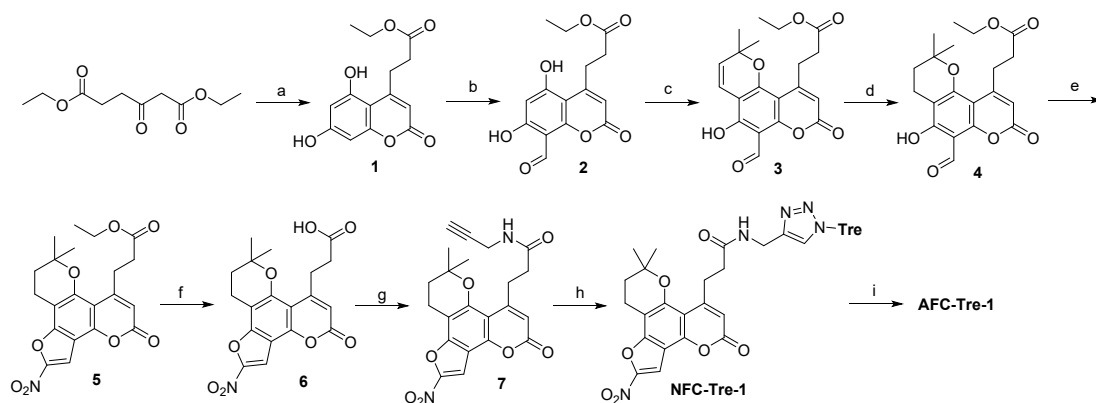

**Scheme S2. Synthesis of Compounds NFC-Tre-1 and AFC-Tre-1.** Reagents and conditions:(a) ethanol, phloroglucinol,  $\text{BF}_3 \cdot \text{C}_2\text{H}_5\text{OC}_2\text{H}_5$ , reflux, overnight, 90%; (b) DCM, DMF,  $\text{POCl}_3$ , rt, overnight, 55%; (c) toluene, 1,1-Diethoxy-3-methyl-2-butene, pyridine, reflux, 3h, 35%; (d) (I)  $\text{Ac}_2\text{O}$ , IR-120, rt, overnight (II) methanol,  $\text{H}_2$ , Pd/C,  $50^\circ\text{C}$ , 1h (III) methanol  $\cdot$   $\text{K}_2\text{CO}_3$ , rt, 2h, 80%;(e) (I) acetone,  $\text{BrCH}_2\text{NO}_2$ ,  $\text{K}_2\text{CO}_3$ , 3h (II) acetic anhydride, reflux, overnight, 60%; (f) 6N HCl, reflux, 1h, 50%;(g) DCM, propargulamine, EDCI, HOBT, DIPEA, rt, 2h, 55-65%;(h) DMF, Tre- $\text{N}_3$ , Vc-Na,  $\text{CuSO}_4$ ,  $\text{H}_2\text{O}$ , rt, 30min, 50%; (i) Fe,  $\text{NH}_4\text{Cl}$ , EtOH/ $\text{H}_2\text{O}$ , rt, overnight, 10%.

**Synthetic procedure of intermediate Ethyl 3-(5,7-dihydroxy-2-oxo-2H-chromen-4-yl)propanoate (1).** Boron trifluoride ether (21.3 g, 150 mmol) was added to a solution of phloroglucinol (12.6 g, 100 mmol) and diethyl 3-oxoadipate (23.8 g, 110 mmol) in 300 ml ethanol at  $0^\circ\text{C}$ , and the reaction mixture was stirred at reflux overnight and monitored by LCMS until all the starting material was consumed completely. Water (500 mL) was added and the residue was washed with 5% sodium bicarbonate aqueous solution. The dried crude product can be used in the next step without purification.

**Synthetic procedure of intermediate Ethyl 3-(8-formyl-5,7-dihydroxy-2-oxo-2H-chromen-4-yl)propanoate (2).** Phosphorus trichloride (12.2 mL, 15 mmol) was added to DMF (10.5 mL, 15 mmol) in an ice bath and stirred for 30 min. Then a solution of intermediate 1 (20.8 g, 7.5 mmol) in dichloromethane was added to DMF- $\text{POCl}_3$  mixture and stirred overnight at room temperature. After the reaction was completed, dichloromethane was removed in vacuo and 400 mL ice water was slowly added for stirring for 30 min. The residue was washed with water and ethyl acetate to obtained intermediate 2 (12.5 g, 55%).  $^1\text{H}$  NMR (400 MHz, DMSO)  $\delta$  12.25 (s, 1H), 10.16 (s, 1H), 6.27 (s, 1H), 6.07 (s, 1H), 4.15 – 3.98 (m, 2H), 3.17 (t,  $J = 7.5$

Hz, 2H), 2.63 (t,  $J = 7.6$  Hz, 2H), 1.18 (t,  $J = 7.1$  Hz, 3H).  $^{13}\text{C}$  NMR (101 MHz, DMSO)  $\delta$  190.7, 172.32, 165.6, 164.7, 159.2, 158.8, 157.0, 110.7, 103.7, 102.3, 99.1, 60.5, 33.6, 31.1, 14.6.

**Synthetic procedure of intermediate Ethyl3-(6-formyl-5-hydroxy-2,2-dimethyl-8-oxo-2H,8H-pyrano[2,3-f]chromen-10-yl)propanoate (3).** To a solution of intermediate **2** (8 g, 26 mmol) in 100 mL toluene was added 1,1-diethoxy-3-methylbut-2-ene (6.2 g, 39 mmol) and pyridine (320  $\mu\text{L}$ , 4 mmol). The mixture was stirred under reflux for 3 hours. After the reaction was complete, the reaction mixture was concentrated in vacuum and the residue was purified by column chromatography on silica gel (petroleum: ethyl acetate=4:1) to obtain intermediate **3** (3.4g, 35%).  $^1\text{H}$  NMR (400 MHz,  $\text{CDCl}_3$ )  $\delta$  12.82 (s, 1H), 10.39 (s, 1H), 6.68 (d,  $J = 10.1$  Hz, 1H), 6.07 (s, 1H), 5.61 (d,  $J = 10.1$  Hz, 1H), 4.31 – 4.06 (m, 2H), 3.25 (dd,  $J = 9.5, 5.9$  Hz, 2H), 2.73 – 2.52 (m, 2H), 1.55 (s, 6H), 1.29 (t,  $J = 7.1$  Hz, 3H).  $^{13}\text{C}$  NMR (101 MHz,  $\text{CDCl}_3$ )  $\delta$  192.1, 172.0, 161.5, 158.7, 158.2, 157.9, 155.7, 126.8, 115.0, 111.8, 105.5, 104.0, 102.3, 80.6, 60.8, 34.0, 31.7, 28.2, 14.3.

**Synthetic procedure of intermediate Ethyl3-(6-formyl-5-hydroxy-2,2-dimethyl-8-oxo-3,4-dihydro-2H,8H-pyrano[2,3-f]chromen-10-yl)propanoate (4).** To a solution of intermediate **3** (3 g, 8 mmol) in 30 mL of acetic anhydride was added 3 g Amberlite IR-120 and stirred for overnight at room temperature. The reaction was monitored by LCMS until all the starting material was consumed completely, then the acetic anhydride was evaporated under vacuum. The residue was dissolved in 60 mL methanol and added 1g 10% Pd/C, the mixture was stirred under atmosphere of  $\text{H}_2$  at 50°C for 1 hours. The reaction was monitored by LCMS until all the starting material was consumed completely, then the reaction mixture was filtered. Then add potassium carbonate (5.6 g, 40 mmol) to the solution and stir for 2 hours at room temperature. The reaction monitored by LCMS until all the starting material was consumed completely. The reaction mixture was filtered and concentrated in vacuum. The residue was purified by column chromatography on silica gel (petroleum: ethyl acetate=4:1) to obtain intermediate **4** (2.4 g, 80%).  $^1\text{H}$  NMR (400 MHz,  $\text{CDCl}_3$ )  $\delta$  12.96 (s, 1H), 10.41 (s, 1H), 6.07 (s, 1H), 4.28 – 4.10 (m, 2H), 3.34 – 3.14 (m, 2H), 2.73 (t,  $J = 6.8$  Hz, 2H), 2.67 – 2.55 (m, 2H), 1.88 (t,  $J = 6.8$  Hz, 2H), 1.46 (s, 6H), 1.30 (t,  $J = 7.1$  Hz, 3H).  $^{13}\text{C}$  NMR (101 MHz,  $\text{CDCl}_3$ )  $\delta$  192.0, 172.0, 164.5, 159.2, 158.8, 157.2, 156.2, 111.6, 105.1, 103.4, 102.4, 78.7, 60.8, 34.3, 32.0, 31.0, 26.6, 15.9, 14.3.

**Synthetic procedure of intermediate Ethyl3-(9,9-dimethyl-2-nitro-5-oxo-10,11-dihydro-5H,9H-furo[2,3-f]pyrano[2,3-h]chromen-7-yl)propanoate (5).** To a solution of the intermediate **4** (2.4 g, 6.4 mmol) in 20 mL acetone was added  $K_2CO_3$  (2.7 g, 19.2 mmol) and  $BrCH_2NO_2$  (672  $\mu$ L, 9.6 mmol) at room temperature and the reaction mixture was stirred for 1.5 hours. The reaction mixture was filtered and concentrated in vacuum and the residue was stirred in 30 mL acetic anhydride for overnight at 140 °C. Then the reaction mixture was cooled and concentrated in vacuum. The residue was purified by column chromatography on silica gel (petroleum: ethyl acetate=4:1) to obtain intermediate **5** (2 g, 60%).  $^1H$  NMR (400 MHz,  $CDCl_3$ )  $\delta$  7.93 (s, 1H), 6.24 (s, 1H), 4.30 – 4.14 (m, 2H), 3.43 – 3.27 (m, 2H), 3.06 (t,  $J$  = 6.8 Hz, 2H), 2.76 – 2.61 (m, 2H), 1.98 (t,  $J$  = 6.8 Hz, 2H), 1.50 (s, 6H), 1.31 (t,  $J$  = 7.1 Hz, 3H).  $^{13}C$  NMR (101 MHz,  $CDCl_3$ )  $\delta$  172.0, 159.2, 156.4, 153.9, 153.7, 152.6, 149.5, 114.1, 108.8, 107.7, 106.1, 102.1, 78.3, 60.8, 34.3, 32.1, 30.6, 26.5, 16.5, 14.3.

**Synthetic procedure of intermediate 3-(9,9-dimethyl-2-nitro-5-oxo-10,11-dihydro-5H,9H-furo[2,3-f]pyrano[2,3-h]chromen-7-yl)propanoic acid (6).** The intermediate **5** was dissolved in 30 mL 6N hydrochloric acid to (1.3 g, 3 mmol) and stirred overnight at 100°C. The reaction monitored by LCMS until all the starting material was consumed completely, then the reaction mixture was filtered and washed with methanol to obtain intermediate **6** (0.93 g 50%).  $^1H$  NMR (400 MHz, DMSO)  $\delta$  8.31 (s, 1H), 6.30 (s, 1H), 3.32 (s, 2H), 2.93 (t,  $J$  = 6.7 Hz, 2H), 2.59 – 2.51 (m, 2H), 1.92 (t,  $J$  = 6.7 Hz, 2H), 1.41 (s, 6H).  $^{13}C$  NMR (101 MHz, DMSO)  $\delta$  173.7, 158.8, 157.0, 154.0, 153.6, 152.6, 149.3, 114.2, 108.7, 107.6, 107.4, 102.4, 78.7, 49.1, 34.4, 31.9, 30.2, 26.4, 16.4.

**Synthetic procedure of intermediate 3-(9,9-dimethyl-2-nitro-5-oxo-10,11-dihydro-5H,9H-furo[2,3-f]pyrano[2,3-h]chromen-7-yl)-N-(prop-2-yn-1-yl)propenamide (7).** To a solution of EDCI (385 mg, 2 mmol) and HOBt (270 mg, 2 mmol) in 20 mL anhydrous dichloromethane was added the intermediate **6** (0.6 g, 1.5 mmol) and stirred for half an hour, then propargylamine (110 mg, 2 mmol) and DIPEA (774 mg, 6 mmol) were added, continue stirring for 2 hours. The reaction monitored by LCMS until all the starting material was consumed completely, then the reaction mixture was concentrated in vacuum. The residue was purified by column chromatography on silica gel (petroleum: ethyl acetate=4:1) to obtain intermediate **7** (41 mg 65%).  $^1H$  NMR (400 MHz, DMSO)  $\delta$  8.34 (s, 1H), 8.32 (s, 1H), 6.25 (s, 1H), 3.89 (dd,  $J$  = 5.3,

2.3 Hz, 2H), 3.18 (dd,  $J = 10.3, 4.8$  Hz, 2H), 3.10 (t,  $J = 2.3$  Hz, 1H), 2.94 (t,  $J = 6.6$  Hz, 2H), 2.45 (t,  $J = 7.6$  Hz, 2H), 1.93 (t,  $J = 6.6$  Hz, 2H), 1.43 (s, 6H).  $^{13}\text{C}$  NMR (101 MHz, DMSO)  $\delta$  170.8, 158.9, 157.6, 154.2, 153.7, 152.7, 149.4, 114.1, 108.6, 107.7, 107.5, 102.4, 81.6, 78.8, 73.4, 35.4, 32.2, 30.3, 28.3, 26.5, 16.4.

**Synthetic procedure of compound NFC-Tre-1.** To a solution of terminal alkyne (0.23 mmol) and Tre- $\text{N}_3$  (90 mg, 0.23 mmol, the intermediate synthesized according to reported literature<sup>1</sup>) in 3 ml of DMF was stirred for 10 minutes, then Vc-Na (20 mg, 0.1 mmol) and copper sulfate (37.5 mg, 0.15 mmol) were added. The reaction monitored by LCMS until all the starting material was consumed completely, then the reaction mixture was concentrated in vacuum. The residue was purified by HPLC to obtain compound **NFC-Tre-1** (81 mg, 45%).  $^1\text{H}$  NMR (400 MHz, DMSO)  $\delta$  8.39 (t,  $J = 5.4$  Hz, 1H), 8.33 (s, 1H), 7.81 (s, 1H), 6.25 (s, 1H), 5.29 (d,  $J = 5.3$  Hz, 1H), 4.95 (d,  $J = 4.9$  Hz, 1H), 4.84 (d,  $J = 3.4$  Hz, 1H), 4.81 – 4.73 (m, 3H), 4.69 (d,  $J = 6.1$  Hz, 1H), 4.62 – 4.53 (m, 2H), 4.43 (dd,  $J = 14.3, 7.5$  Hz, 1H), 4.32 (dd,  $J = 11.6, 5.6$  Hz, 3H), 4.12 (t,  $J = 7.7$  Hz, 1H), 3.66 – 3.48 (m, 4H), 3.46 – 3.39 (m, 1H), 3.20 (dd,  $J = 8.8, 5.1$  Hz, 4H), 3.09 (td,  $J = 9.3, 5.2$  Hz, 1H), 3.01 – 2.90 (m, 3H), 2.48 – 2.43 (m, 2H), 1.91 (t,  $J = 6.5$  Hz, 2H), 1.39 (s, 6H).  $^{13}\text{C}$  NMR (101 MHz, DMSO)  $\delta$  170.7, 158.4, 157.3, 153.8, 153.2, 152.1, 148.8, 144.6, 123.3, 113.5, 108.1, 107.2, 107.0, 101.9, 93.4, 78.4, 72.9, 72.6, 71.5, 71.4, 71.3, 70.1, 69.8, 60.8, 56.1, 50.7, 35.0, 34.2, 31.8, 29.8, 26.0, 18.6, 15.9. HRMS (ESI):  $m/z$  ( $\text{M}+\text{H}^+$ ) calcd for  $\text{C}_{34}\text{H}_{42}\text{O}_{17}\text{N}_5$ , 792.2570, found: 792.2551.

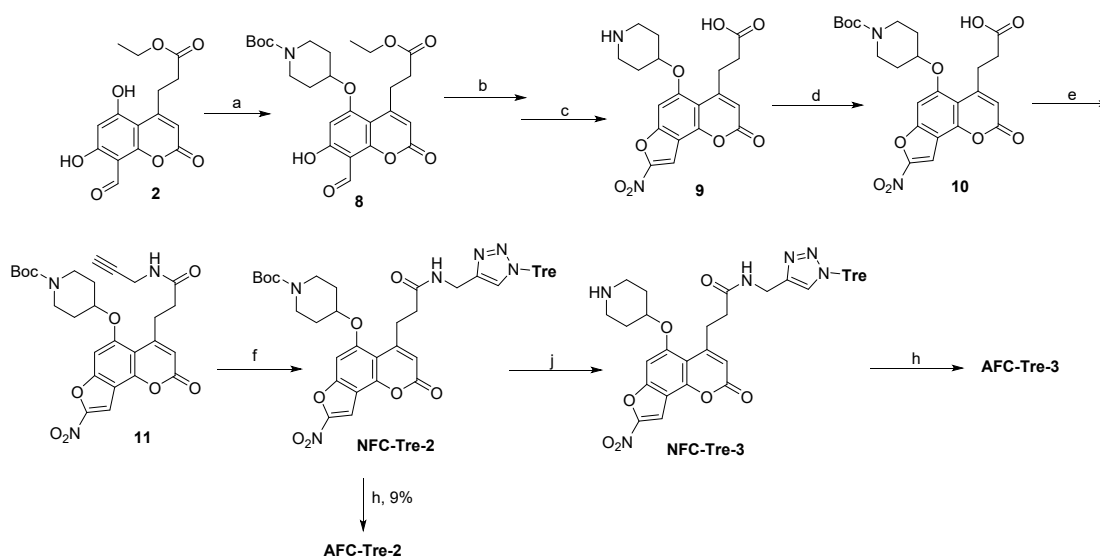

**Scheme S3.** Synthesis of Compounds **NFC-Tre-2**, **NFC-Tre-3**, **AFC-Tre-2** and **AFC-Tre-**

3. Reagents and conditions:(a) THF, PPh<sub>3</sub>, DIAD, rt, overnight, 30%; (b) acetone, BrCH<sub>2</sub>NO<sub>2</sub>, K<sub>2</sub>CO<sub>3</sub>, rt, 3h; (c) 6N HCl, reflux, overnight, 50%; (d) DCM, Boc<sub>2</sub>O, DIPEA, rt, 3h, 65%; (e) DCM, propargulamine, EDCI, HOBt, DIPEA, rt, 2h, 55-65%; (f) DMF, Tre-N<sub>3</sub>, Vc-Na, CuSO<sub>4</sub>, H<sub>2</sub>O, rt, 30min, 50%; (g) DCM, TFA, rt, 1h, 80-90%; (h) Fe, NH<sub>4</sub>Cl, EtOH/H<sub>2</sub>O, rt, overnight, 9%-15%.

**Synthetic procedure of compounds NFC-Tre-2 and NFC-Tre-3.** The compounds **NFC-Tre-2** and **NFC-Tre-3** were synthesized according to the synthetic procedure of compounds **NFC-Tre-1**.

**NFC-Tre-2** <sup>1</sup>H NMR (400 MHz, DMSO) δ 8.44 – 8.32 (m, 2H), 7.79 (s, 1H), 7.65 (s, 1H), 6.26 (s, 1H), 5.28 (d, *J* = 5.1 Hz, 1H), 4.94 (d, *J* = 4.5 Hz, 1H), 4.88 – 4.81 (m, 2H), 4.78 – 4.73 (m, 2H), 4.67 (d, *J* = 6.1 Hz, 1H), 4.62 – 4.52 (m, 2H), 4.43 (dd, *J* = 14.4, 7.7 Hz, 1H), 4.33– 4.27 (m, 2H), 4.11 (t, *J* = 8.2 Hz, 1H), 3.81 (d, *J* = 13.3 Hz, 2H), 3.66 – 3.48 (m, 4H), 3.46 – 3.39 (m, 1H), 3.25 – 3.17 (m, 4H), 3.15 – 3.04 (m, 3H), 3.02 – 2.92 (m, 1H), 2.46 (d, *J* = 7.5 Hz, 2H), 2.08 (d, *J* = 10.3 Hz, 2H), 1.65 (d, *J* = 9.2 Hz, 2H), 1.41 (s, 9H). <sup>13</sup>C NMR (101 MHz, DMSO) δ 170.6, 158.2, 157.8, 157.2, 155.1, 153.9, 152.3, 150.6, 144.6, 123.2, 113.4, 109.1, 107.6, 106.6, 93.3, 93.1, 78.9, 75.3, 72.8, 72.6, 71.5, 71.4, 71.3, 70.1, 69.8, 60.8, 50.7, 34.58, 34.2, 31.9, 29.9, 28.1. HRMS (ESI): *m/z* (M+H<sup>+</sup>) calcd for C<sub>39</sub>H<sub>51</sub>O<sub>19</sub>N<sub>6</sub>, 907.3203, found: 907.3186.

**NFC-Tre-3** <sup>1</sup>H NMR (400 MHz, DMSO) δ 4.87 – 4.77 (m, 2H), 7.83 (s, 1H), 7.66 (s, 1H), 6.29 (s, 1H), 5.32 (d, *J* = 4.7 Hz, 1H), 5.01 (d, *J* = 4.0 Hz, 1H), 4.93 (s, 1H), 4.87 – 4.77 (m, 4H), 4.71 (d, *J* = 5.6 Hz, 1H), 4.62 – 4.54 (m, 2H), 4.43 (dd, *J* = 14.6, 7.8 Hz, 1H), 4.37 – 4.30 (m, 2H), 4.14 – 4.07 (m, 1H), 3.66 – 3.47 (m, 5H), 3.46 – 3.40 (m, 1H), 3.26 – 3.17 (m, 4H), 3.10 (d, *J* = 8.4 Hz, 3H), 3.01 – 2.93 (m, 1H), 2.30 – 2.20 (m, 2H), 2.02 – 1.92 (m, 4H). <sup>13</sup>C NMR (101 MHz, DMSO) δ 170.7, 158.2, 157.5, 157.1, 155.0, 152.4, 150.6, 123.4, 113.3, 109.4, 107.6, 106.5, 93.3, 93.2, 79.3, 79.0, 78.7, 72.9, 72.6, 72.3, 71.5, 71.4, 71.3, 70.1, 69.8, 60.7, 56.1, 50.8, 41.2, 34.5, 34.2, 32.0, 26.9, 18.6. HRMS (ESI): *m/z* (M+H<sup>+</sup>) calcd for C<sub>34</sub>H<sub>43</sub>O<sub>17</sub>N<sub>6</sub>, 807.2679, found: 807.2668.



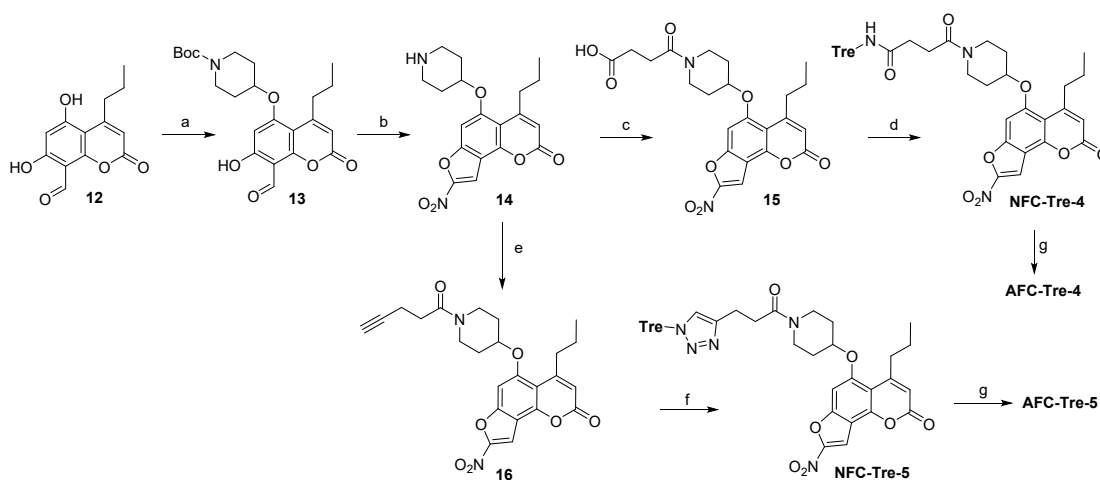

**Scheme S4. Synthesis of NFC-Tre-4 and NFC-Tre-5.** Reagents and conditions:(a) THF, 1-Boc-4-piperidinol, PPh<sub>3</sub>, DIAD, rt, overnight, 68%; (b) i, NO<sub>2</sub>CH<sub>2</sub>Br, K<sub>2</sub>CO<sub>3</sub>, acetone, rt, 3 h; ii, TFA, 80°C, 1 h, 50%; (c) Toluene, Succinic anhydride, DIPEA, 110°C, 3 h, 82%; (d) DMF, Tre-NH<sub>2</sub>, EDCI, HOBt, DIPEA, rt, 55%.; (e) DMF, Pentynoic acid, EDCI, HOBt, DIPEA, rt, 87%; (f) DMF, Tre-N<sub>3</sub>, Vc-Na, CuSO<sub>4</sub>, H<sub>2</sub>O, rt, 30min, 89%; (g) Fe, NH<sub>4</sub>Cl, EtOH/H<sub>2</sub>O, rt, overnight, 8%-10%.

**Synthetic procedure of intermediate tert-butyl 4-((8-formyl-7-hydroxy-2-oxo-4-propyl-2H-chromen-5-yl)oxy)piperidine-1-carboxylate (13).** Intermediate **12** was synthesized according to our previous report<sup>2</sup>. To a solution of Intermediate **12** (6.45 g, 26 mmol) and the 1-Boc-4-piperidinol (5.2 g, 26 mmol) in 150 mL of THF was added PPh<sub>3</sub> (10.2 g, 39 mmol) and diisopropyl azodiformate (8.9 g, 44 mmol) at 0°C. The reaction mixture was stirred for overnight, then concentrated in vacuum. The residue was purified by column chromatography on silica gel (petroleum: ethyl acetate=4:1) to obtain intermediate **13** (7.6 g, 68%).

**Synthetic procedure of intermediate 8-nitro-5-(piperidin-4-yloxy)-4-propyl-2H-furo[2,3-h]chromen-2-one (14).** To a solution of intermediate **13** (3.4 g, 8 mmol) in 40 mL acetone was added K<sub>2</sub>CO<sub>3</sub> (4.5 g, 32 mmol) and BrCH<sub>2</sub>NO<sub>2</sub> (840 μL, 12 mmol) at room temperature and the reaction mixture was stirred for 1.5 hours. The reaction mixture was filtered and concentrated in vacuum, then the residue was treated with 30 mL CF<sub>3</sub>COOH and was stirred for 1 hour at 80 °C. Then the reaction mixture was cooled, then the residue was recrystallization in methanol to obtain the crude product **14** that can be used in the next step without purification.

**Synthetic procedure of intermediate 3-(5-((1-(tert-butoxycarbonyl)piperidin-4-yl)oxy)-8-nitro-2-oxo-2H-furo[2,3-h]chromen-4-yl)propanoic acid (15).** To a solution of intermediate

**14** (1.4 g, 3.7 mmol) in 20 mL toluene was added succinic anhydride (0.55 g, 5.5 mmol) and DIPEA (900 mg, 7 mmol). The reaction mixture was stirred for 3h at 110°C, then concentrated in vacuum. The residue was recrystallization in ether to obtain intermediate **15** (1.5 g, 82%).

**Synthetic procedure of compound NFC-Tre-4.** To a solution of intermediate **15** (94 mg, 0.2 mmol) in 20 ml anhydrous dichloromethane was added EDCI (39 mg, 0.2 mmol) and HOBT (27 mg, 0.2 mmol), stirred for half an hour, then added Tre-NH<sub>2</sub> (68 mg, 0.2 mmol, the intermediate synthesized according to reported literature<sup>1</sup>) and DIPEA (77 mg, 0.6 mmol), continue stirring for 2 hours. Upon completion as shown by LC-MS, the reaction mixture was concentrated in vacuum. The residue was purified by HPLC to obtain intermediate **NFC-Tre-4** (87 mg, 55%). <sup>1</sup>H NMR (400 MHz, DMSO) δ 8.33 (s, 1H), 7.77 (s, 1H), 7.67 (s, 1H), 6.30 (s, 1H), 4.95 – 4.89 (m, 3H), 4.85 (d, *J* = 12.0 Hz, 2H), 4.79 – 4.75 (m, 2H), 4.71 – 4.61 (m, 3H), 4.37 – 4.31 (m, 1H), 4.14 (d, *J* = 13.3 Hz, 1H), 3.86 (d, *J* = 11.5 Hz, 1H), 3.76 – 3.70 (m, 1H), 3.67 – 3.62 (m, 1H), 3.58 – 3.44 (m, 5H), 3.30 – 3.21 (m, 3H), 3.17 – 3.04 (m, 3H), 3.99 – 3.89 (m, 3H), 2.63 – 2.55 (m, 2H), 2.42 – 2.31 (m, 2H), 2.16 (dd, *J* = 25.8, 11.4 Hz, 2H), 1.69 (d, *J* = 9.1 Hz, 1H), 1.64 – 1.53 (m, 3H), 0.96 (t, *J* = 6.5 Hz, 3H). <sup>13</sup>C NMR (101 MHz, DMSO) δ 172.2, 172.1, 170.0, 158.3, 158.0, 157.8, 155.0, 152.3, 150.7, 113.3, 109.2, 107.7, 106.6, 93.4, 93.3, 93.1, 75.2, 72.7, 72.5, 71.7, 71.6, 71.4, 70.5, 70.1, 60.8, 42.5, 38.1, 30.6, 30.4, 30.0, 27.9, 22.5, 13.6. HRMS (ESI): *m/z* (M+H<sup>+</sup>) calcd for C<sub>35</sub>H<sub>46</sub>O<sub>18</sub>N<sub>3</sub>, 796.2771, found: 796.2756.

**Synthetic procedure of compound NFC-Tre-5.** Compound **NFC-Tre-5** was synthesized according to **NFC-Tre-1**. <sup>1</sup>H NMR (400 MHz, DMSO) δ 8.28 (s, 1H), 7.78 (s, 1H), 7.62 (s, 1H), 6.27 (s, 1H), 5.31 (d, *J* = 5.2 Hz, 1H), 4.97 (d, *J* = 4.6 Hz, 1H), 4.90 (s, 1H), 4.83 (d, *J* = 3.5 Hz, 1H), 4.81 – 4.77 (m, 3H), 4.59 – 4.52 (m, 2H), 4.42 – 4.34 (m, 2H), 4.19 – 4.08 (m, 2H), 3.85 (d, *J* = 13.1 Hz, 1H), 3.64 – 4.52 (m, 5H), 3.26 – 3.16 (m, 3H), 3.12 – 3.06 (m, 2H), 3.03 – 2.96 (m, 1H), 2.95 – 2.89 (m, 2H), 2.87 – 2.82 (m, 2H), 2.71 (d, *J* = 7.4 Hz, 2H), 2.22 – 2.09 (m, 2H), 1.66 (d, *J* = 7.1 Hz, 1H), 1.58 (dt, *J* = 14.8, 7.4 Hz, 4H), 0.95 (t, *J* = 7.3 Hz, 3H). <sup>13</sup>C NMR (101 MHz, DMSO) δ 170.2, 158.8, 158.4, 158.3, 155.5, 152.7, 151.1, 146.5, 122.8, 113.8, 109.6, 108.1, 107.1, 93.7, 93.5, 75.6, 73.3, 73.1, 72.0, 71.9, 71.7, 70.5, 70.3, 70.2, 61.1, 51.2, 42.9, 38.5, 32.5, 31.1, 30.4, 22.9, 21.5, 14.0. HRMS (ESI): *m/z* (M+H<sup>+</sup>) calcd for C<sub>36</sub>H<sub>46</sub>O<sub>18</sub>N<sub>5</sub>, 820.2883, found: 820.2870.

**The general route of the NFC-Tre reduction products**

NFC-Tre (1eq) was dissolved in ethanol and reduced iron powder (10eq) was added. Then ammonium chloride (10eq) dissolved in water was added and stirred overnight. After the reaction was completed, the iron mud was removed by filtration, and the filtrate was separated and purified by HPLC.

#### AFC-Tre-1

$^1\text{H}$  NMR (800 MHz, DMSO)  $\delta$  10.21 (s, 1H), 8.36 (s, 1H), 7.80 (s, 1H), 5.95 (s, 1H), 5.28 (s, 1H), 4.95 – 4.88 (m, 1H), 4.84 (s, 1H), 4.81 – 4.66 (m, 4H), 4.60 – 4.5 (m, 2H), 4.43 (dd,  $J$  = 14.0, 7.4 Hz, 1H), 4.29 (d,  $J$  = 4.4 Hz, 2H), 4.13 – 4.10 (m, 1H), 3.84 (s, 2H), 3.64 – 3.61 (m, 1H), 3.59 – 3.56 (m, 1H), 3.54 – 3.50 (m, 2H), 3.45 – 3.42 (m, 2H), 3.21 (d,  $J$  = 7.3 Hz, 2H), 3.14 – 3.08 (m, 4H), 2.98 (t,  $J$  = 8.8 Hz, 1H), 2.64 – 2.61 (m, 2H), 2.44 – 2.41 (m, 2H), 1.80 – 1.76 (m, 2H), 1.30 (s, 6H).  $^{13}\text{C}$  NMR (201 MHz, DMSO)  $\delta$  170.8, 159.3, 157.6, 156.5, 152.2, 152.0, 144.7, 144.7, 123.2, 118.5, 109.9, 105.6, 102.5, 97.5, 93.3, 93.2, 75.9, 72.8, 72.6, 71.5, 71.3, 71.3, 70.0, 69.7, 60.7, 50.7, 35.1, 34.2, 31.9, 30.6, 25.9, 17.4, 11.5. HRMS (ESI):  $m/z$  ( $\text{M}+\text{H}^+$ ) calcd for  $\text{C}_{34}\text{H}_{44}\text{O}_{15}\text{N}_5$ , 762.2828, found: 762.2820.

#### AFC-Tre-2

$^1\text{H}$  NMR (400 MHz, DMSO)  $\delta$  8.37 (s, 1H), 7.80 (s, 1H), 6.55 (s, 1H), 5.94 (s, 1H), 5.29 (s, 1H), 4.95 (s, 1H), 4.84 (s, 1H), 4.81 – 4.73 (m, 3H), 4.71 – 4.66 (m, 1H), 4.62 – 4.55 (m, 3H), 4.48 – 4.39 (m, 1H), 4.31 – 4.25 (m, 2H), 4.16 – 4.00 (m, 2H), 3.77 (s, 2H), 3.73 – 3.67 (m, 2H), 3.66 – 3.49 (m, 6H), 3.46 – 3.43 (m, 1H), 3.23 – 3.19 (m, 2H), 3.15 – 3.11 (m, 3H), 3.01 – 2.05 (m, 1H), 2.45 – 2.40 (m, 2H), 2.02 – 1.94 (m, 2H), 1.68 – 1.58 (m, 2H), 1.41 (s, 9H).  $^{13}\text{C}$  NMR (201 MHz, DMSO)  $\delta$  170.8, 159.1, 157.4, 155.5, 154.4, 153.8, 144.6, 123.2, 118.3, 109.2, 105.4, 102.4, 97.5, 96.6, 93.3, 91.3, 87.9, 78.9, 73.8, 72.8, 72.6, 72.6, 71.5, 71.3, 71.3, 70.1, 69.7, 60.8, 50.7, 40.0, 34.7, 34.2, 31.7, 29.8, 28.1, 11.0. HRMS (ESI):  $m/z$  ( $\text{M}+\text{H}^+$ ) calcd for  $\text{C}_{39}\text{H}_{53}\text{O}_{17}\text{N}_6$ , 877.3462, found: 877.3448.

#### AFC-Tre-3

$^1\text{H}$  NMR (400 MHz, DMSO)  $\delta$  8.41 (s, 1H), 7.82 (s, 1H), 6.67 (s, 1H), 5.79 (s, 1H), 4.83 (s, 1H), 4.68 – 4.49 (m, 3H), 4.48 – 4.38 (m, 1H), 4.30 (s, 2H), 4.12 (t,  $J$  = 9.1 Hz, 1H), 3.72 (s, 2H), 3.65 – 3.40 (m, 7H), 3.22 (d,  $J$  = 6.4 Hz, 3H), 3.14 – 3.03 (m, 4H), 3.01 – 2.91 (m, 2H), 2.44 – 2.24 (m, 4H), 2.16 – 1.97 (m, 2H), 1.79 – 1.62 (m, 2H).  $^{13}\text{C}$  NMR (201 MHz, DMSO)  $\delta$  170.9, 160.0, 159.9, 159.9, 158.1, 157.9, 157.7, 155.4, 155.4, 144.7, 123.2, 93.3, 93.2, 72.8,

72.6, 72.5, 71.5, 71.4, 71.3, 70.0, 69.7, 60.7, 56.7, 56.0, 55.9, 50.7, 45.1, 35.1, 34.2, 31.8, 15.7, 11.0. HRMS (ESI):  $m/z$  ( $M+H^+$ ) calcd for  $C_{34}H_{45}O_{15}N_6$ , 777.2937, found: 777.2927.

#### AFC-Tre-4

$^1H$  NMR (400 MHz, DMSO)  $\delta$  7.72 (d,  $J = 4.4$  Hz, 1H), 6.51 (s, 1H), 5.91 (s, 1H), 4.91 (d,  $J = 3.4$  Hz, 1H), 4.87 – 4.85 (m, 1H), 4.76 (dd,  $J = 19.7, 3.4$  Hz, 2H), 4.68 – 4.63 (m, 1H), 4.62 – 4.58 (m, 1H), 4.03 – 3.91 (m, 1H), 3.82 – 3.70 (m, 3H), 3.69 – 3.61 (m, 1H), 3.60 – 3.42 (m, 4H), 3.42 – 3.37 (m, 1H), 3.18 – 3.09 (m, 3H), 3.00 – 2.93 (m, 1H), 2.90 – 2.82 (m, 2H), 2.59 – 2.54 (m, 1H), 2.41 – 2.31 (m, 3H), 2.11 – 2.00 (m, 2H), 1.71 – 1.52 (m, 4H), 0.94 (t,  $J = 7.3$  Hz, 3H). HRMS (ESI):  $m/z$  ( $M+H^+$ ) calcd for  $C_{35}H_{48}O_{16}N_3$ , 766.3029, found: 766.3022.

#### AFC-Tre-5

$^1H$  NMR (400 MHz, DMSO)  $\delta$  8.41 – 8.39 (m, 1H), 7.77 (s, 1H), 6.26 (s, 1H), 5.67 (s, 1H), 5.29 (s, 1H), 4.86 – 4.74 (m, 3H), 4.63 – 4.50 (m, 3H), 4.43 – 4.34 (m, 1H), 4.16 – 4.08 (m, 1H), 4.02 – 3.91 (m, 1H), 3.75 – 3.66 (m, 3H), 3.64 – 3.56 (m, 2H), 3.56 – 3.48 (m, 3H), 3.15 – 3.06 (m, 3H), 3.03 – 2.92 (m, 2H), 2.87 – 2.77 (m, 4H), 2.66 (dd,  $J = 10.5, 4.6$  Hz, 2H), 2.07 – 1.93 (m, 2H), 1.61 – 1.46 (m, 4H), 0.93 (t,  $J = 6.2$  Hz, 3H).  $^{13}C$  NMR (101 MHz, DMSO)  $\delta$  169.7, 156.0, 158.6, 155.5, 155.2, 146.1, 122.4, 119.3, 99.6, 98.6, 98.2, 98.1, 98.0, 93.6, 93.3, 78.6, 72.9, 72.7, 72.6, 71.6, 71.5, 71.3, 70.1, 69.8, 60.8, 50.7, 42.3, 38.1, 32.1, 30.8, 30.1, 22.9, 21.0, 13.8, 11.1. HRMS (ESI):  $m/z$  ( $M+H^+$ ) calcd for  $C_{36}H_{48}O_{15}N_5$ , 790.3141, found: 790.3126.

#### NFC-Glc

**Synthetic procedure of compound NFC-Glc.** Compound **NFC-Glc** was synthesized according to **NFC-Tre-5**.  $^1H$  NMR (400 MHz, DMSO)  $\delta$  8.33 (s, 1H), 7.81 (s, 1H), 7.67 (s, 1H), 6.30 (s, 1H), 5.46 – 5.32 (m, 1H), 5.03 – 4.89 (m, 2H), 4.87 – 4.81 (m, 1H), 4.71 – 4.62 (m, 1H), 4.49 (s, 1H), 4.36 – 4.25 (m, 1H), 4.21 – 4.10 (m, 1H), 3.93 – 3.77 (m, 1H), 3.66 (t,  $J = 9.2$  Hz, 1H), 3.23 – 3.18 (m, 1H), 3.06 (d,  $J = 10.6$  Hz, 1H), 3.02 – 2.97 (m, 4H), 2.96 – 2.91 (m, 2H), 2.89 – 2.81 (m, 2H), 2.76 – 2.68 (m, 2H), 2.24 – 2.08 (m, 2H), 1.70 – 1.53 (m, 4H), 0.96 (t,  $J = 6.9$  Hz, 3H).  $^{13}C$  NMR (101 MHz, DMSO)  $\delta$  170.1, 158.8, 158.4, 158.3, 155.5, 152.7, 151.1, 146.5, 123.4, 113.8, 109.6, 108.1, 107.0, 100.2, 93.5, 75.6, 73.5, 72.2, 72.1, 71.6, 71.0, 54.7, 51.2, 42.9, 32.3, 31.1, 30.4, 22.9, 21.4, 14.0.

## 2. Bacterial Growth Conditions and Strains

*Mtb* H37Rv, BCG and *M. smeg* were grown in Middlebrook 7H9 supplemented with 0.2% glycerol, 0.05% Tween-80, and 10% oleate-albumin-dextrose-catalase (OADC) enrichment. *Escherichia coli*, *Enterococcus faecalis*, *Listeria monocytogenes* and *Bacillus subtilis* were grown in LB medium, and *Staphylococcus aureus* was grown in THY medium. All these strains were grown in a shaking incubator at 37 °C and 200 rpm except for *Staphylococcus aureus*, which was grown in a static state. All experiments concerning *Mtb* were conducted in accordance with biosafety level III laboratory operating standards.

The bacteria were cultured to the log phase and incubated with 100  $\mu$ M **NFC-Tre-1**, **NFC-Tre-5**, and **DMN-Tre** at 37 °C for 1 h, respectively. **Dil** stained *M. smeg* according to the manufacturer's protocol. A blank control was obtained in cells treated under the same conditions but without fluorescent probes. For *Mtb*, labeled cells were harvested by centrifugation (3000 $\times$ g for 10 min) and then fixed in an equal volume of 4% paraformaldehyde at room temperature for 30 min.

## 3. Animals and Cell Culture

Male C57BL/6 mice (6–8 weeks old) were purchased from Vital River Experimental Animal Co., Ltd. (Beijing, China). Mice were housed in specific pathogen-free conditions with a 12 h light/dark cycle and free access to food and water in the animal research center laboratory of Tsinghua University. All animal protocols were conducted in compliance with the Institute of Animal Care and Use Committee (IACUC) of Tsinghua University approved based on institutional and national guidelines.

Mouse RAW 264.7 macrophages were cultured in Dulbecco's modified Eagle medium (DMEM) (Life Technologies, CA, USA) with 10% (v/v) fetal bovine serum (FBS) (Gibco, Australia). Bone marrow-derived macrophages were prepared based on the general cultural method. All the cells were grown at 37 °C in a 5% CO<sub>2</sub> humidified incubator and guaranteed to be mycoplasma free.

#### **4. The Fluorescence Intensity of Bacteria Was Analyzed by Flow Cytometry**

Bacteria were labeled and analyzed by flow cytometry with a BD LSRFortessa equipped with a four-laser, 14-color analysis from Tsinghua University Instrument Sharing Platform. The Pacific Blue channel with excitation at 405 nm and filtered at 450/50 nm was selected to detect **NFC-Tre** fluorescence. The PE with excitation at 561 nm and filtered at 586/15 nm was selected to detect **Dil** fluorescence. Flow cytometry data analysis was performed using FlowJo v10 software. A paired sample t-test was also performed for fluorescence intensity to determine significant differences between each experimental group. Significance was determined at  $P \leq 0.05$ . Figures were prepared by GraphPad Prism v8.0.

#### **5. Microscope for Fluorescence Imaging**

In general, all the bacteria were labeled and then imaged. A DeltaVision wide-field fluorescence microscope was used in selective evaluation and nonreplication labeling experiments. An Olympus FV1000 confocal microscope was used in the *Mtb*-labeling experiments. An Andor Dragonfly Spinning Disk Confocal Microscope was used for the detection of intracellular mycobacteria. A Super-resolution Nikon SIM Microscope was used for fluorescence distribution imaging of *M. smeg*.

#### **6. Visualizing Mycobacteria in Macrophages with NFC-Tre-5**

Macrophages ( $2.5 \times 10^5$ ) were incubated with freshly cultured BCG strain and *M. smeg* at a multiplicity of infection (MOI) of 5 for 4 h in confocal microscopy dishes 15mm. Then, the cells were washed with PBS (1 mL $\times$ 3), and a solution of **NFC-Tre-5** (100  $\mu$ M) in DMEM was added and incubated for 15 min. The cells were washed and fixed in 4% paraformaldehyde for 30 min. Then, the nucleus and cell membrane were stained with NucRed<sup>TM</sup> Live 647 ReadyProbes<sup>TM</sup> dye and CellMask<sup>TM</sup> orange plasma dye, respectively, according to the manufacturer's protocol.

Mice were treated with  $1 \times 10^6$  CFU of mycobacteria by nasal infection, and alveolar lavage fluid was collected at 24 h. Alveolar macrophages were collected according to published literature.<sup>3</sup> Visualization of mycobacteria in host cells was accomplished with an Andor

Dragonfly confocal microscope, setting excitation at 405 nm and emission at 445/46 nm for cyan fluorescence, excitation at 561 nm and emission at 594/43 nm for red fluorescence, and excitation at 637 nm and emission at 698/77 nm for deep red fluorescence.

## 7. Figures

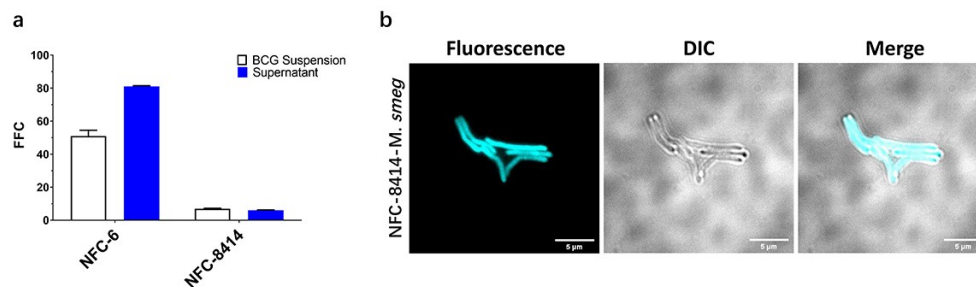

**Fig. S1 NFC-8414 label single Mycobacteria.** (a) Compound NFC-6 and NFC-8414 (5  $\mu\text{M}$ ) were incubated with BCG (OD=0.1) that were grown at 37  $^{\circ}\text{C}$  in Middlebrook 7H9 medium for 24h. The reactions were monitored in Ex (390 nm)/Em (470 nm) by EnVision<sup>®</sup> Multi-mode Plate Reader. NFC-6 was described in previous work. (b) *M. smeg* were treated with 100  $\mu\text{M}$  NFC-8414 for 15min and then imaged.

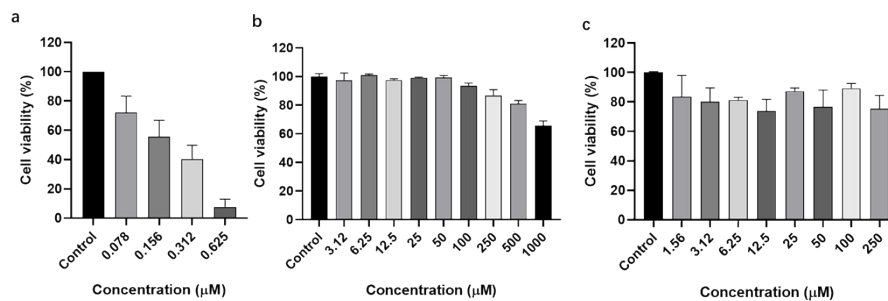

**Fig. S2 Cell viability with MTT assay.** The cell viability of RAW 264.7 macrophages with the treatment of NFC-8414 (a), NFC-Tre-5 (b) and NFC-Glc (c) for 24 h. The MTT assay is performed according to the reported literature<sup>4</sup>. Error bars represent standard deviation of three independent measurements.

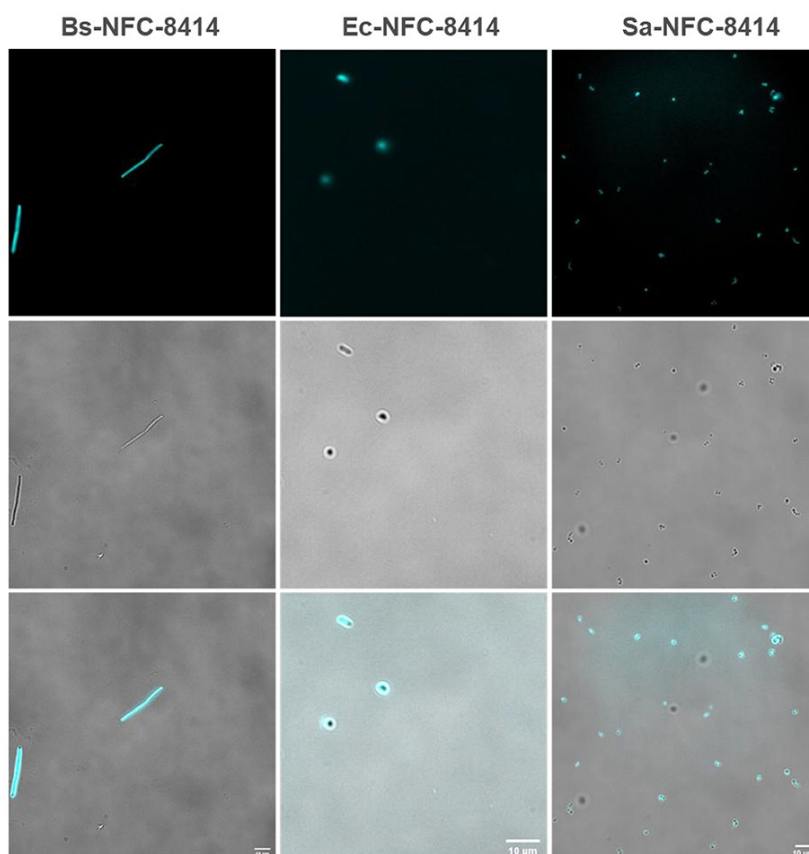

**Fig. S3 Non-specific label bacteria with NFC-8414.** Imaging of *Bacillus subtilis* (Bs), *Escherichia coli* (Ec) and *Staphylococcus aureus* (Sa) cells incubated with 100  $\mu$ M NFC-8414 for 1 h.

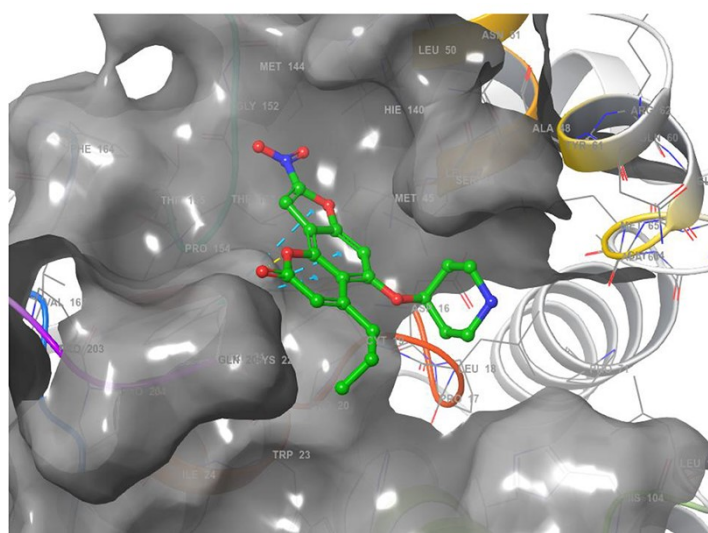

**Fig. S4 Predicted binding mode of compound NFC-8414 with Rv2466c.** NFC-8414 and the WT Rv2466c crystal structure (PDB ID: 4NXI)<sup>5</sup> was prepared using LigPrep and Protein Preparation Wizard,<sup>6</sup> respectively, in Maestro v11.7 (Schrodinger, Inc.: Maestro v11.7, 2018)



and docked using Glide with standard settings. Compound **NFC-8414** (green, sticks), Rv2466c (white, ribbon).

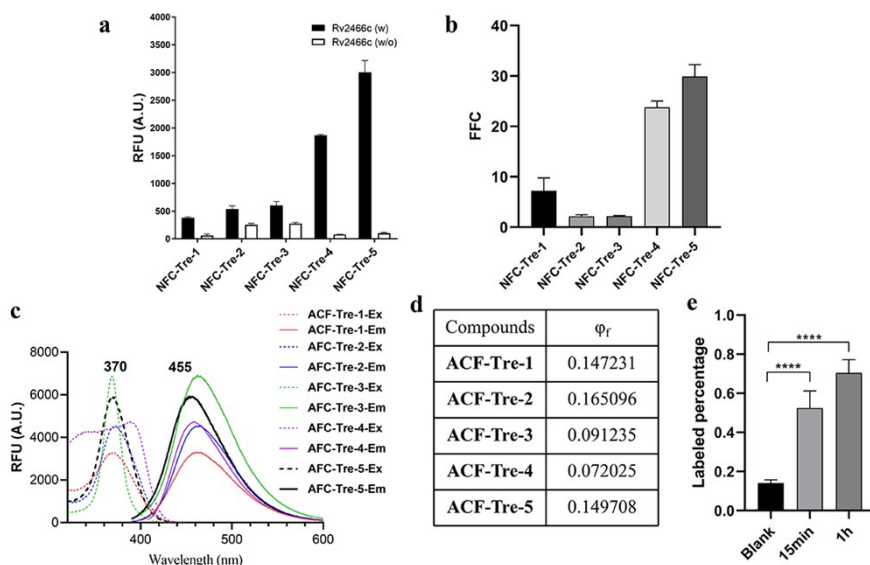

**Fig. S5 NFC-Tres are reduced by Rv2466c to produce fluorescence.** (a) NFC-Tre are reduced by Rv2466c. Fluorescence data were collected with 200  $\mu\text{g}/\text{mL}$  Rv2466c and 5  $\mu\text{M}$  NFC-Tre. (b) The FFC with and without Rv2466c. (c) The spectra of compound **ACF-Tre-5**,  $\lambda_{\text{ex}} = 370$  nm and  $\lambda_{\text{em}} = 455$  nm. (d) Relative fluorescence quantum yield of compounds **ACF-Tre-1** to **ACF-Tre-5**. The  $\phi_f$  of NFC-Tre was measured by means of a comparative method. NFC-Tre were dissolved in dd  $\text{H}_2\text{O}$  and quinine sulfate in 0.1 M  $\text{H}_2\text{SO}_4$  was used as a reference.<sup>7</sup> (e) The ratio of the number of **NFC-Tre-5** labeled cells to mCherry (*Mycobacterium smegmatis*) *M. smeg* cells was analyzed after mCherry *M. smeg* cells were incubated with 100  $\mu\text{M}$  **NFC-Tre-5** for 15 or 1h.

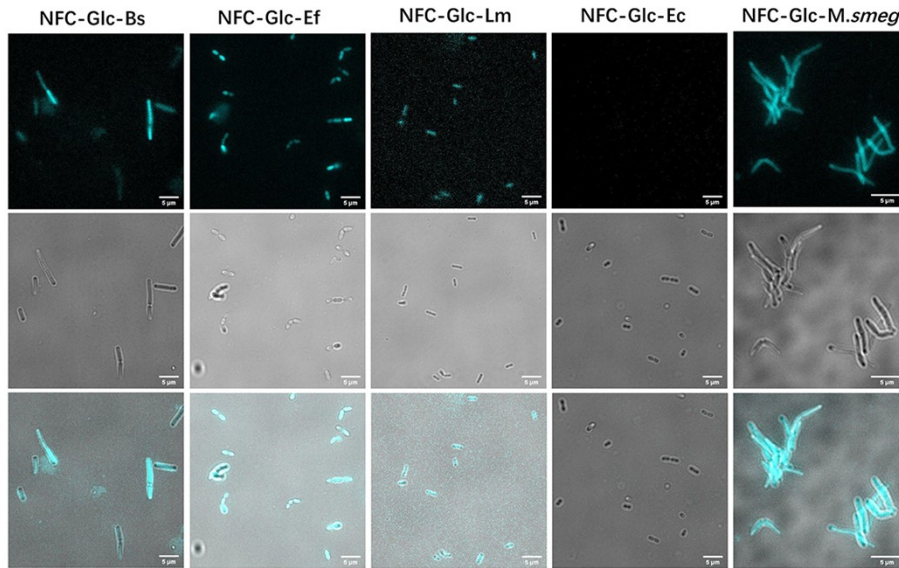

**Fig. S6 Non-specific label bacteria with NFC-Glc.** Imaging of *Bacillus subtilis* (Bs), *Escherichia coli* (Ec), *Enterococcus faecalis* (Ef), *Listeria monocytogenes* (Lm) and *Mycobacterium smegmatis* (*M. smeg*) cells incubated with 100  $\mu\text{M}$  NFC-Glc for 1 h.

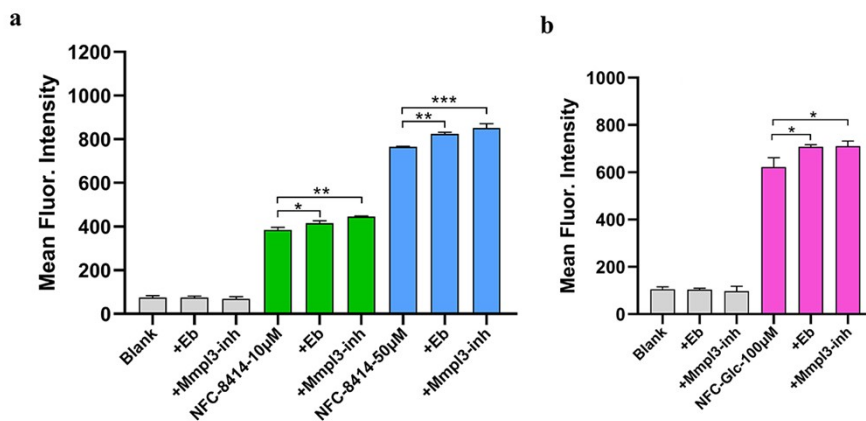

**Fig. S7 (a)** Flow cytometry analysis of the mean fluorescence intensity of *M. smeg* treated with or without 10 $\mu\text{M}$  NFC-8414 and 100  $\mu\text{M}$  NFC-8414; Mmpl3 inhibitor 100  $\mu\text{M}$  (Mmpl3-inh); preincubated ebselen 50  $\mu\text{g}/\text{mL}$  (Eb) for 1h, respectively. **(b)** Flow cytometry analysis of the mean fluorescence intensity of *M. smeg* treated with or without 100 $\mu\text{M}$  NFC-Glc; Mmpl3 inhibitor 100  $\mu\text{M}$  (Mmpl3-inh); ebselen 50  $\mu\text{g}/\text{mL}$  (Eb) for 1h.

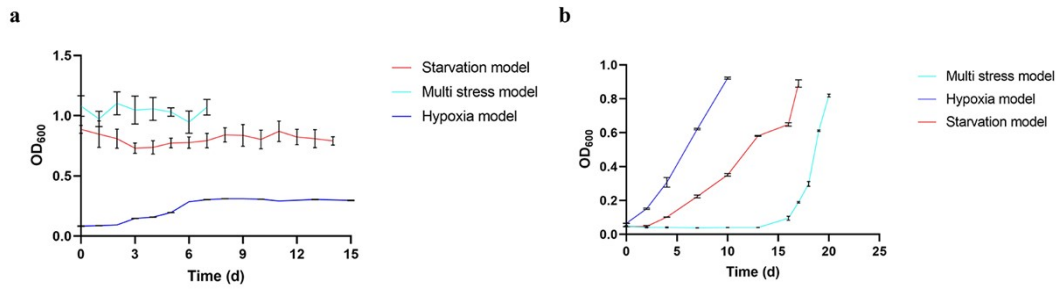

**Fig. S8 Growth of BCG under different stress conditions.** (a) For starvation culture model, BCG was grown to log-phase, harvested and resuspended in PBS plus 0.05% w/v tyloxapol to an OD<sub>600</sub> of 0.9 and incubated standing for 2 weeks. For multiple stress culture model, BCG was grown to log-phase, and resuspended in PCB solution to an OD<sub>600</sub> of 1.0 and incubated for 7 days. PCB solution was prepared by combining 448 mL of 0.2 M dibasic sodium phosphate with 552 mL of 0.1 M citric acid. The pH was adjusted to pH 4.5 with 0.2 M dibasic sodium phosphate or 0.1 M citric acid solution at room temperature. Tyloxapol was added to a final concentration of 0.05% v/v. BCG was grown to log-phase, then were diluted 10-fold in 7H9 medium and transferred to sealed tubes. The cultures were grown at 37 °C for 15 days. (b) Non-replicating BCG produced by different stress conditions harvested and resuspended in 7H9 medium, The cultures were grown under normal conditions for 10-20 days.

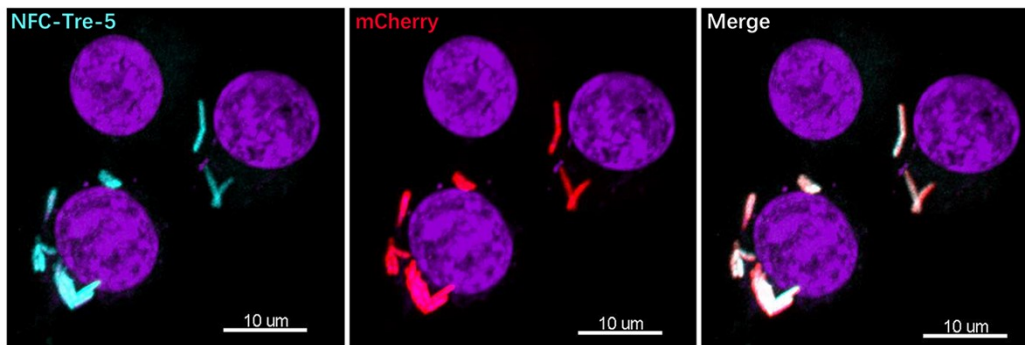

**Fig. S9 Detecting live mycobacteria in macrophages with NFC-Tre-5.** Prepared Raw 264.7 cells were incubated with freshly cultured mCherry *M. smeg* strain at a 1-to-5 ratio for 4 h and washed three times with PBS, then NFC-Tre-5 (100 μM) was added and incubated for 15 min. Raw 264.7 cells were imaged with Nuclear dye (NucRed) according to the manufacturer's protocol.

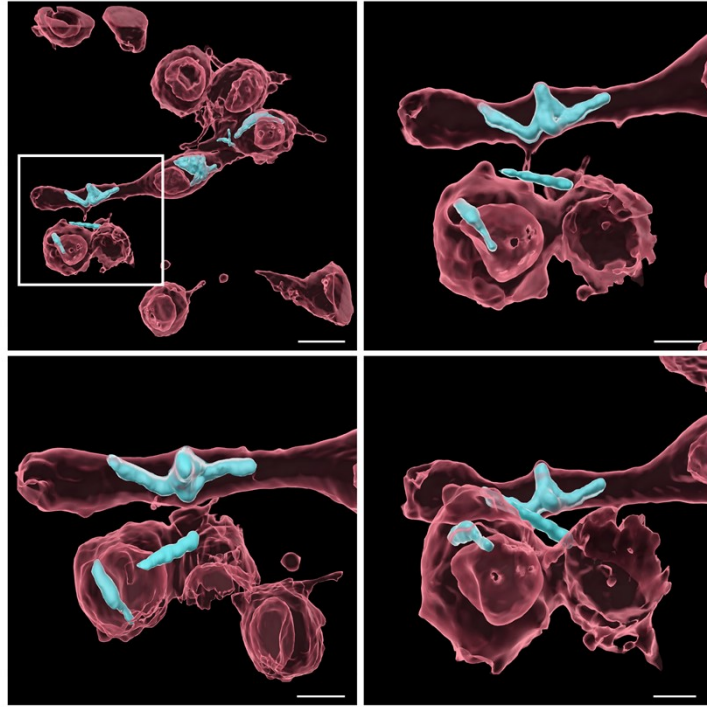

**Fig. S10** Reconstructing the virtual surface of *M. smeg*-infected RAW 264.7 cells in Figure 5.

Transparent red represents the cell membrane; solid cyan represents *M. smeg*.

## 9. NMR Spectra

### $^1\text{H}$ NMR spectra of NFC-Tre-1.

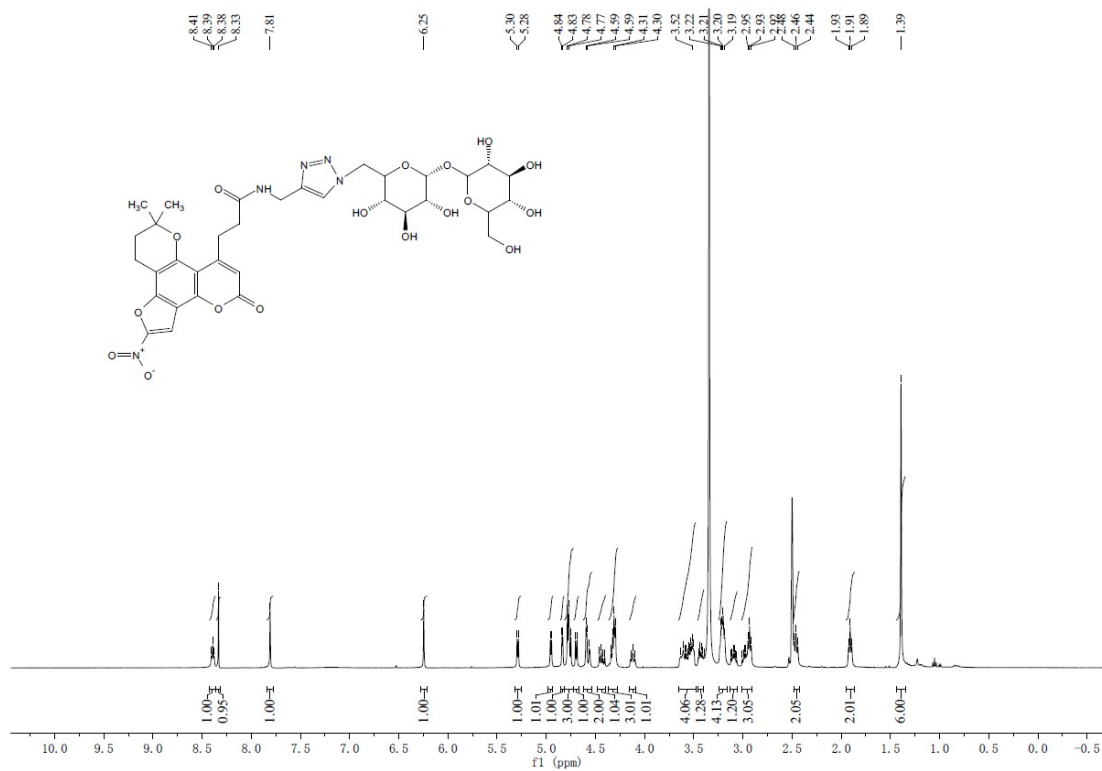

### $^{13}\text{C}$ NMR spectra of NFC-Tre-1

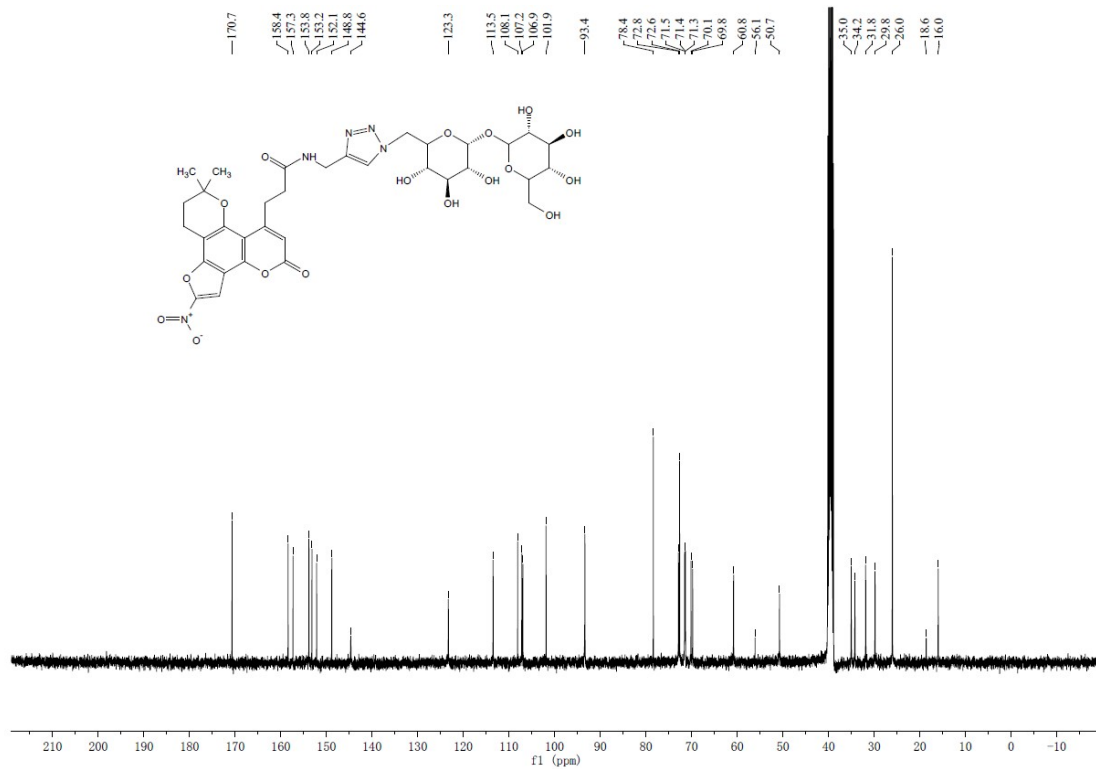

### <sup>1</sup>H NMR spectra of NFC-Tre-2

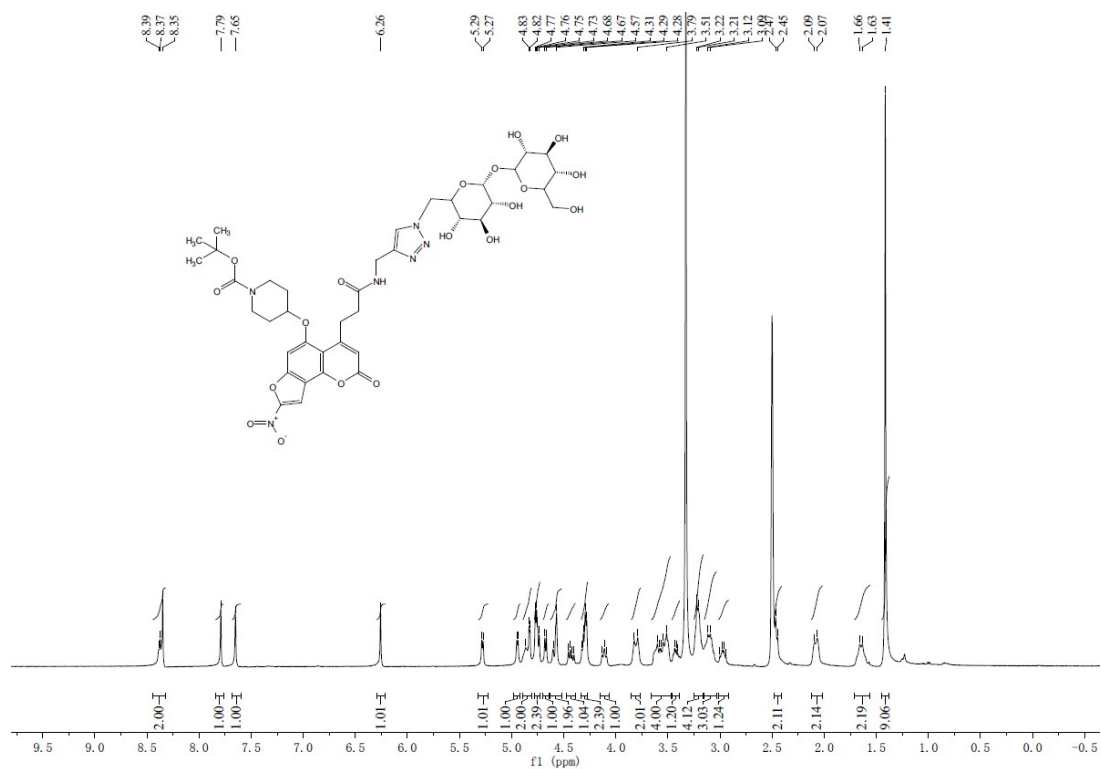

### <sup>13</sup>C NMR spectra of NFC-Tre-2

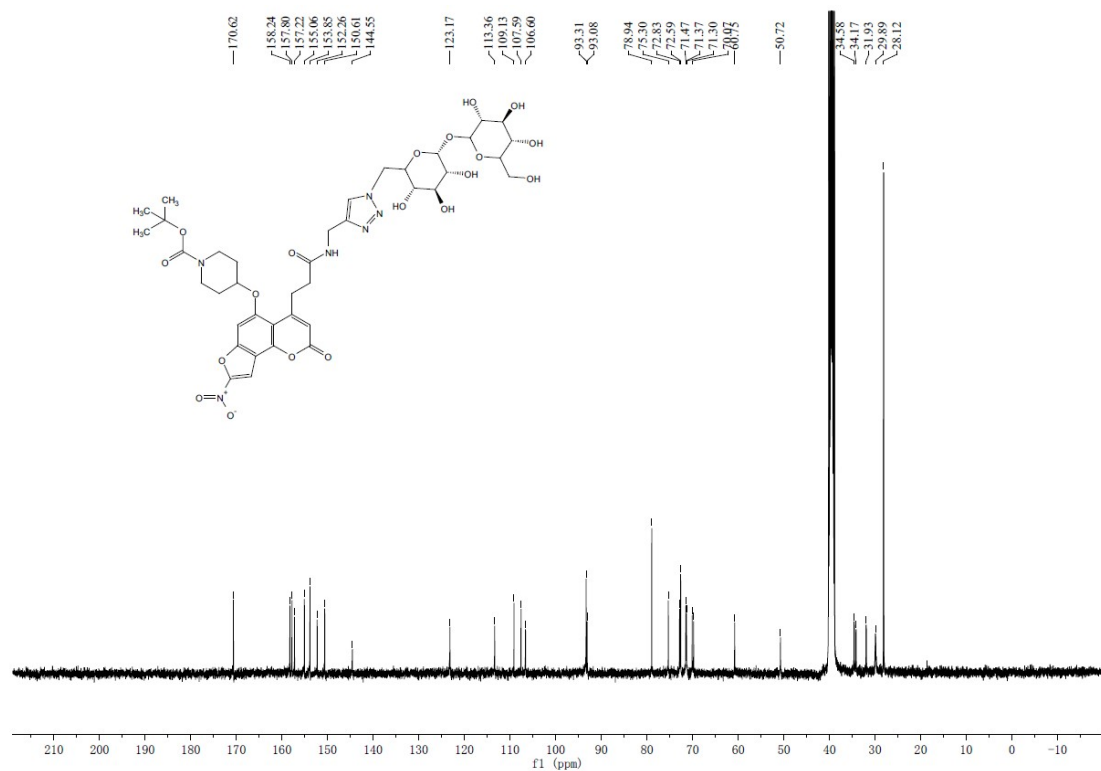

### <sup>1</sup>H NMR spectra of NFC-Tre-3

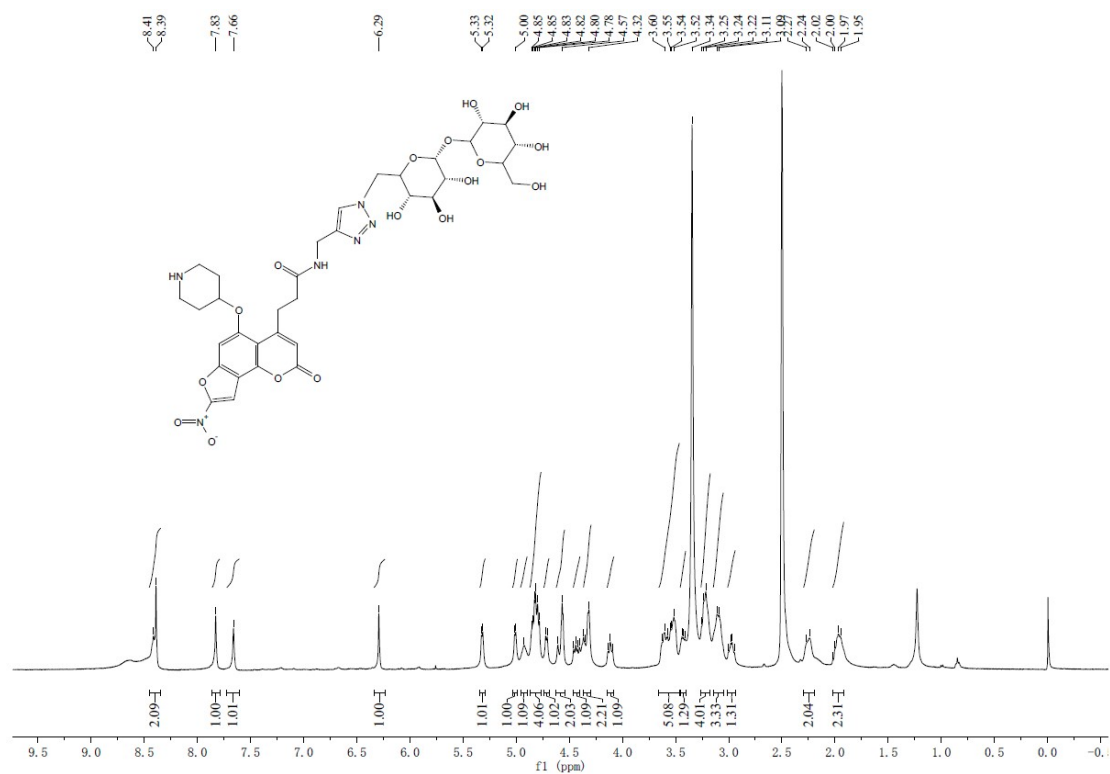

### <sup>13</sup>C NMR spectra of NFC-Tre-3

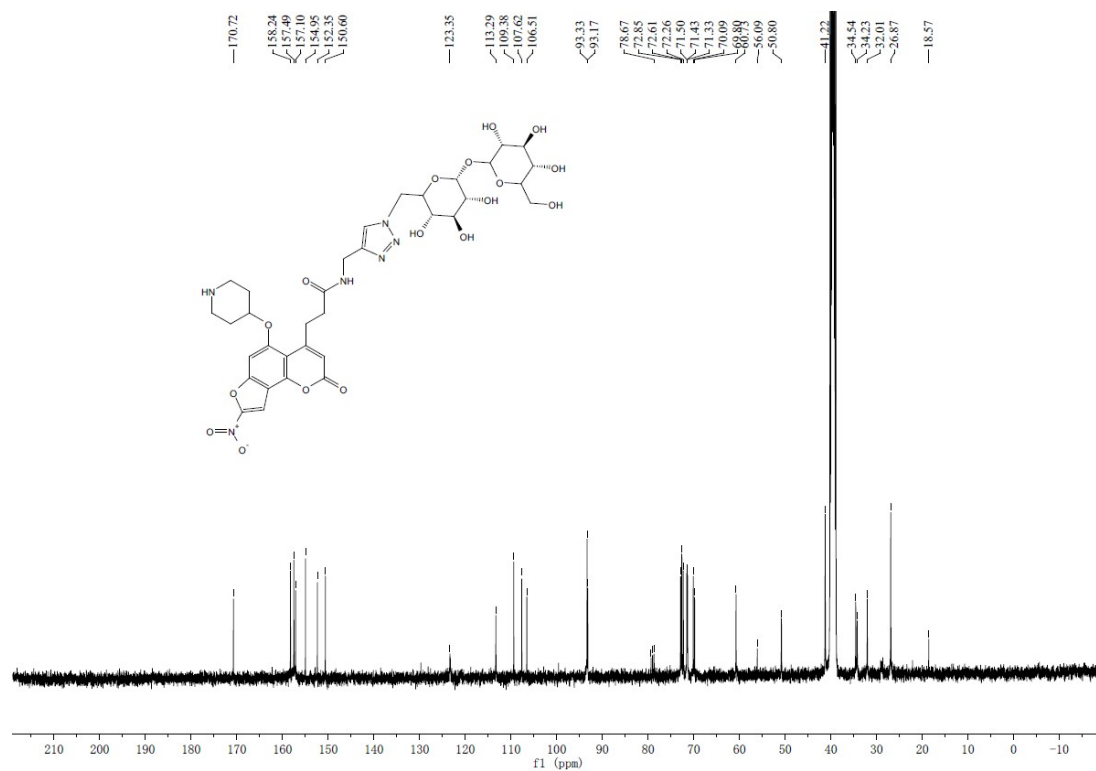

### <sup>1</sup>H NMR spectra of NFC-Tre-4

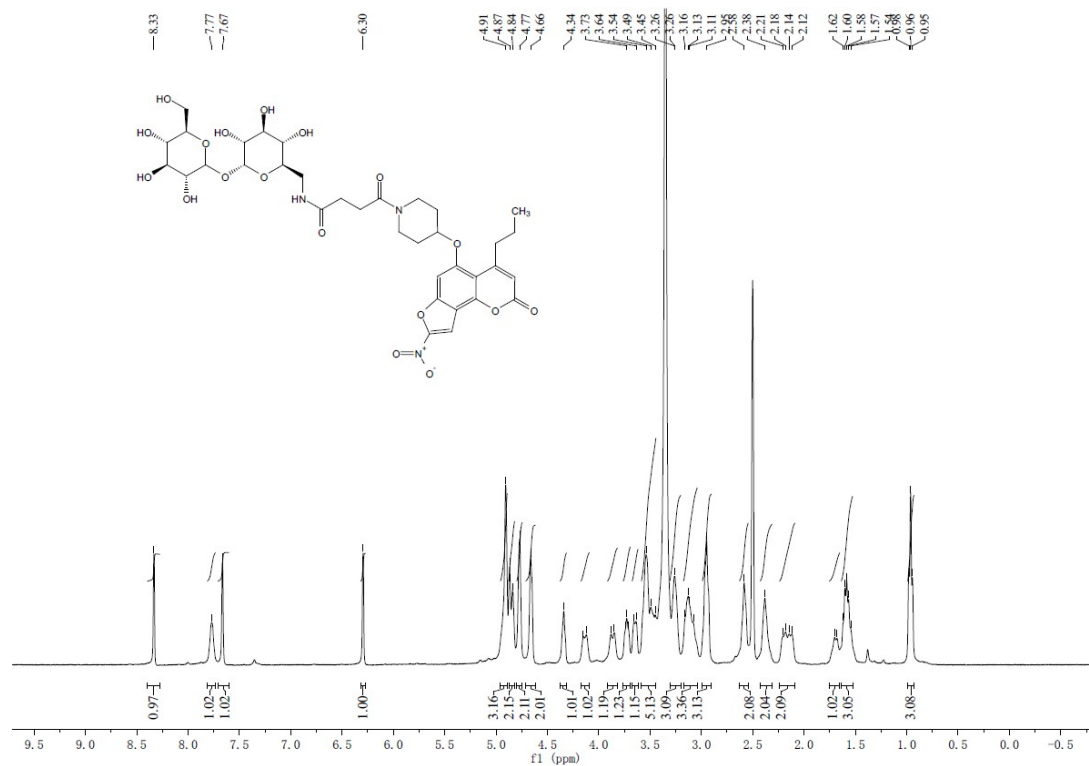

### <sup>13</sup>C NMR spectra of NFC-Tre-4

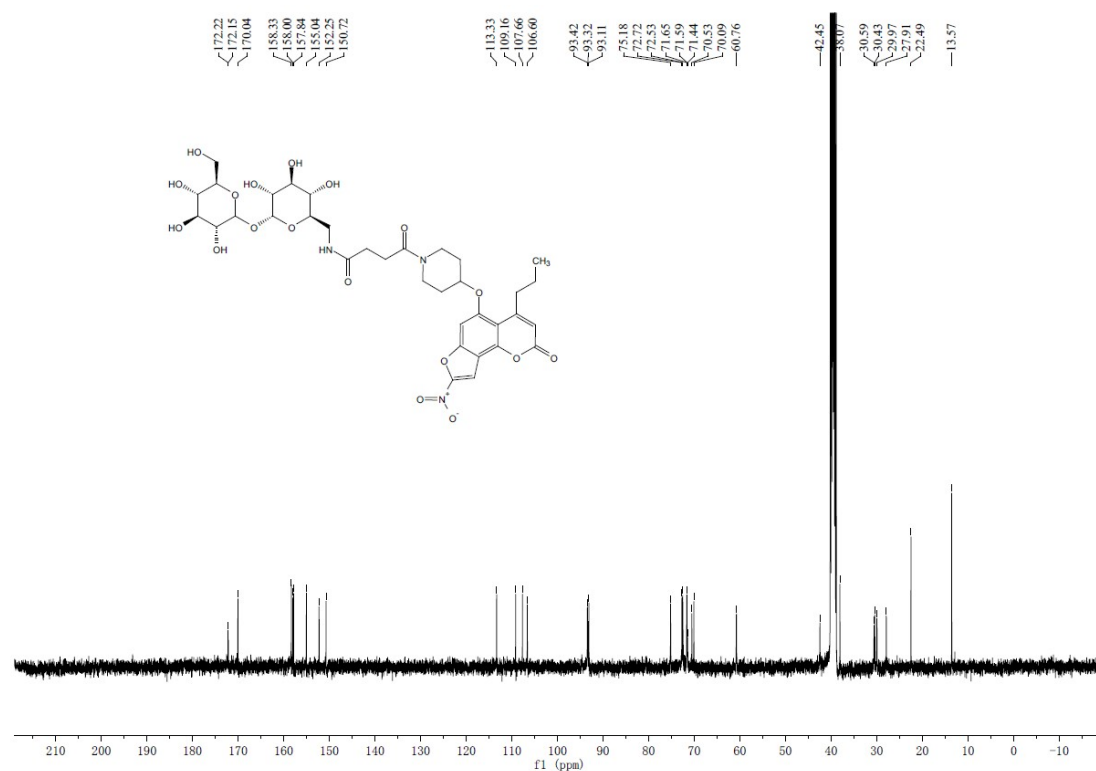



### <sup>1</sup>H NMR spectra of NFC-Tre-5

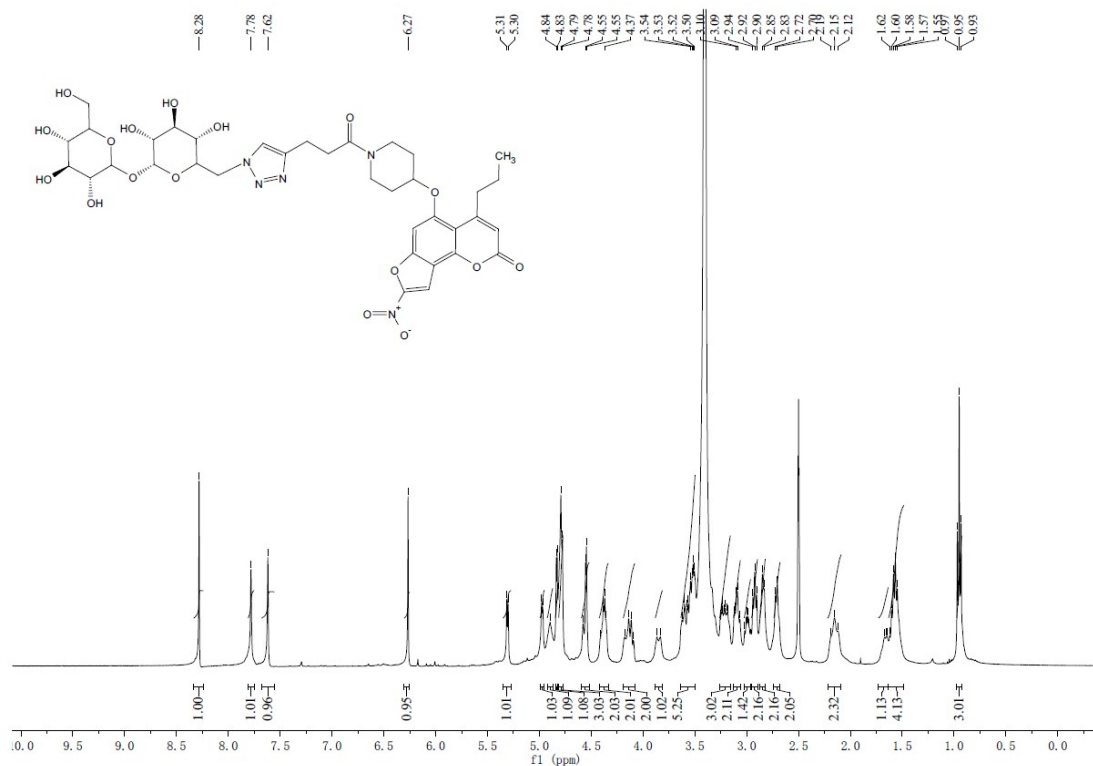

### <sup>13</sup>C NMR spectra of NFC-Tre-5

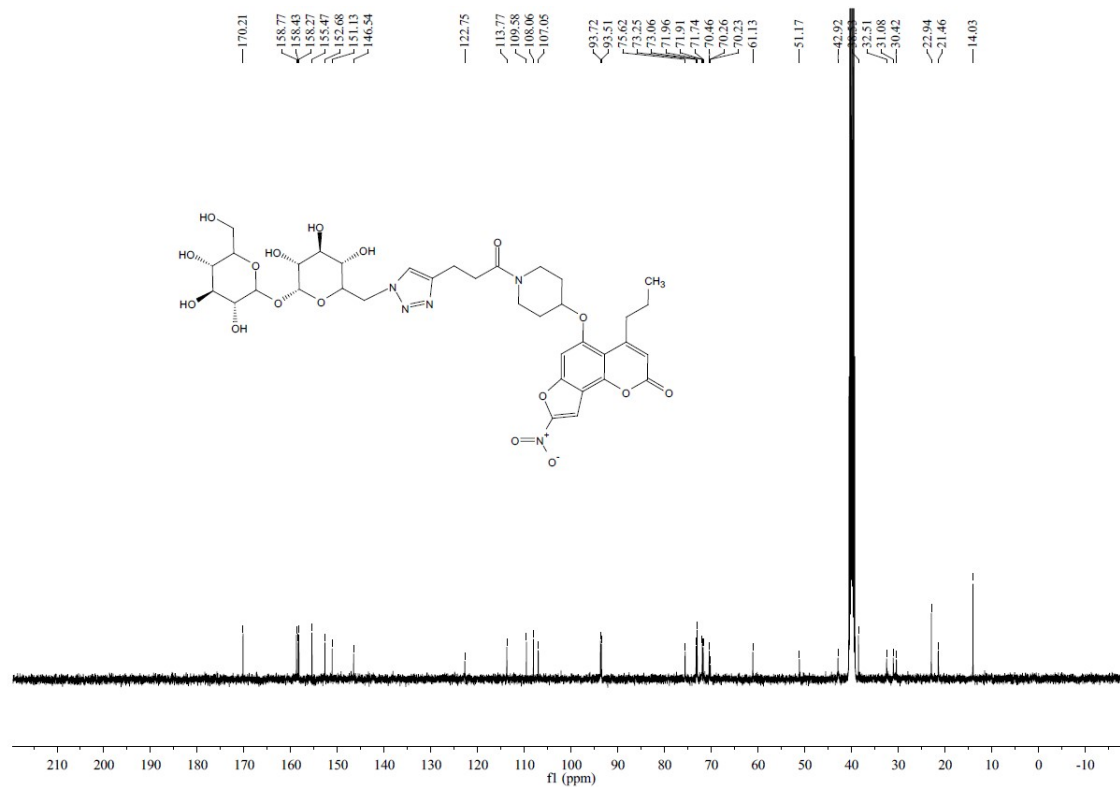

## 10. References

1. Sizovs, A. *et al.* Poly(trehalose): sugar-coated nanocomplexes promote stabilization and effective polyplex-mediated siRNA delivery. *J. Am. Chem. Soc.*, **135**, 15417-15424 (2013).
2. Zheng, P. *et al.* Synthetic calanolides with bactericidal activity against replicating and nonreplicating *Mycobacterium tuberculosis*. *J. Med. Chem.*, **57**, 3755-3772 (2014).
3. Rothchild, A. C.; Mai, D.; Aderem, A.; Diercks, A. H. Flow cytometry analysis and fluorescence-activated cell sorting of myeloid cells from lung and bronchoalveolar lavage samples from *Mycobacterium tuberculosis*-infected Mice. *Bio. Protoc.*, **10**, No. e3630 (2020) .
4. Fischer, D. *et al.* In vitro cytotoxicity testing of polycations influence of polymer structure on cell viability and hemolysis. *Biomaterials*, **24**, 1121-1131 (2003).
5. Albesa-Jove, D. *et al.* The Redox state regulates the conformation of Rv2466c to activate the antitubercular prodrug TP053. *J. Biol. Chem.*, **290**, 31077-31089 (2015).
6. Sastry, G. M. *et al.* Protein and ligand preparation: parameters, protocols, and influence on virtual screening enrichments. *J. Comput. Aided. Mol. Des.*, **27**, 221-234 (2013).
7. Wang, J. *et al.* High performance photoluminescent carbon dots for in vitro and in vivo bioimaging: effect of nitrogen doping ratios. *Langmuir* **31**, 8063-8073 (2015).

## 11. Acknowledgment

We gratefully appreciate Professors Babak Javid and Jingren Zhang at Tsinghua University for their kind provision of bacteria. We would like to sincerely acknowledge the assistance of the Imaging Core Facility, Tsinghua Center for Protein Science, Tsinghua University, for assistance with the use of DeltaVision, Andor Dragonfly Spinning Disk and Nikon SIM microscopes, especially Yanli Zhang for her enthusiastic and professional guidance in cell imaging technology. We thank Bin Yu (Center of Biomedical Analysis, Tsinghua University) for her kind help with the flow cytometry analysis. We gratefully acknowledge the funding support of grants from the National Natural Science Foundation of China (grants 81773575 and 81573289). This work was supported by funds from the Beijing Advanced Innovation Center for Structural Biology, Tsinghua University, and Beijing Municipal Natural Science

Foundation (21JG0034).
